# Supplementary material for: A network pharmacology approach reveals new candidate caloric restriction mimetics in C. elegans
Source: PubMed Central journal article supplement (PMC4783339; doi:10.1111/acel.12432), 2015-12-16
Supplement: ACEL-15-256-s007.pdf [file ACEL-15-256-s007.pdf]

**Table S1. Human genes used to query the Connectivity Map and their relative change in the CR transcriptional profile used.**

|      | Genes                                                                                                                                                                                              |
|------|----------------------------------------------------------------------------------------------------------------------------------------------------------------------------------------------------|
| Up   | MDM2, HSD17B4, RPS8, HSPA8, SMPD2, KPNB1, DNAJB6 /// TMEM135, CXXC1, SETDB1, CA4, JAK1, ING1, WRNIP1, KPNB1, POLR2A, DNAJB6, CA4, MOGS, UBB, SUCLA2, KPNB1, UBB, ARNT, CRYZ, CCT7, RPS8 /// RPS8P8 |
| Down | CAPRIN1, RPL23, RPL3, ACTG1, PPP3CB, MAP7, FDFT1, TFPI, RBBP4, LOC100294182 /// RPL3, LAMA1                                                                                                        |

**Table S3. The variation seen in lifespan effects of drugs compared to controls in N2 and *eat-2* worm strains.** The maximum and minimum change in lifespan in all of the trials performed and the number of trials performed of each lifespan assay in drug-treated *C. elegans*. Abbreviations: TSA

| Treatment                   | % Difference observed | Number of replicates |
|-----------------------------|-----------------------|----------------------|
| N2 + RAPAMYCIN              | 10.4 to 22.8          | 5                    |
| N2+ TSA                     | 8.71 to 23.2          | 5                    |
| N2 + GELDANAMYCIN           | 1.52 to 3.06          | 4                    |
| N2 + LY-294002              | 13.8 to 22.8          | 4                    |
| N2 + ALLANTOIN              | 20.4 to 25.0          | 3                    |
| <i>eat-2</i> + RAPAMYCIN    | -3.30 to 10.7         | 5                    |
| <i>eat-2</i> + TSA          | -0.317 to 5.81        | 5                    |
| <i>eat-2</i> + GELDANAMYCIN | -20.9 to 9.71         | 4                    |
| <i>eat-2</i> + LY-294002    | -1.15 to 13.6         | 4                    |
| <i>eat-2</i> + ALLANTOIN    | 1.97 to 8.63          | 3                    |
